# Supplementary material for: Development and Validation of a Prostate Cancer Genomic Signature that Predicts Early ADT Treatment Response Following Radical Prostatectomy
Source: Oxford University Press journal article supplement (doi:10.1158/1078-0432.ccr-17-2745), 2018-05-14
Supplement: 10780432ccr172745-sup-189590_3_supp_4727003_p826lt.xlsx [file 10780432ccr172745-sup-189590_3_supp_4727003_p826lt.xlsx]

## Sheet: SuppTable 1 NE biomarkers
Supplementary Table1: Neuroendocrine genes from multiple studies
LUCAP	BELTRAN et al	LIN et al	LAPUK et al	TZELEPI et al
ABLIM2	AB073658	ACAA2	ABCC8	ACBD6
ACSL4	ABHD8	ADAM22	AC004410.1	AK055418
ADAM23	ACTL6B	ADAMTS14	ACTL6B	AK091544
ADAMTS18	AF161441	ADAMTS18	ADCY1	ANLN
ADCY1	AHDC1	ADCYAP1	ADCYAP1	ASPM
ADCY5	AK000477	ADORA1	AFP	AURKA
ADCYAP1	AK024736	ADRA2C	ANLN	CASC5
ADD2	AK054931	AGAP2	APLN	CCNE2
AJAP1	AK055267	AGBL4	APLP1	CDC25C
ALMS1	AK056073	AIM1L	APOD	CDKN2A
AMER3	AK092511	AK7	ASCL1	CDKN2B
AMPH	AK095115	AMDHD1	ASF1B	CELF4
ANAPC4	AK096668	ANKRD36	ATF5	CENPF
ANK2	AK097527	ANP32E	ATP1A3	CERK
ANP32E	AK098017	AP3B2	AURKB	DONSON
AOC1	AK123483	APLP1	BEX1	DPY19L1
AP3B2	AK125051	ARHGAP11B	BRUNOL4	DTNA
APBB2	AK126380	ASAP1	C19orf30	FLJ42351
ARHGEF2	AK127555	ASTN1	C1QL1	GPR173
ARHGEF7	AK307291	ASXL3	C21orf29	GPSM2
ARL6IP6	AK311458	ATAD5	C21orf58	HELLS
ARNTL2	AKIRIN2	ATP1A3	CA9	HIST1H4C
ASCL1	AMH	AZI1	CABP7	Hs.658489
ASXL3	ANLN	BEGAIN	CACNA1A	IQGAP3
ATP2A3	AP3B2	BEND5	CADM2	KIF2C
B3GALTL	APAF1	BIRC5	CBLN2	KPNA2
B3GNT8	ARHGAP11A	BRSK1	CCNE1	LDHB
B4GALT5	ARHGAP11B	BSN	CCNE2	MAP1B
BAALC	ARHGEF18	C10orf140	CCNF	PCNA
BAI3	ARID3C	C12orf39	CDC20	PHF19
BAZ2B	ARNTL2	C12orf42	CDC25B	PLP2
BCL2	ASB16	C12orf56	CDC6	PRKAR1A
BDKRB1	ASF1B	C19orf55	CDCA8	PRR11
BEX1	ASPHD1	C19orf57	CDH18	PSRC1
BSN	ASPM	C2orf70	CDH26	PTTG1
C11orf16	AURKA	C4orf21	CDKN3	SH3GL2
C12orf39	AURKB	C6orf118	CEL	SLC7A5
C1orf112	AX746487	C6orf126	CENPF	TACC3
C2CD4C	AX747026	C6orf138	CER1	TECR
CA10	AX747191	C6orf174	CGA	TMEM74
CABP7	AX747488	C9orf100	CHGA	TRIM9
CACNA2D3	AX748233	C9orf40	CHGB	TUBA1B
CADPS	AZI1	CA10	CLSPN	TUBA1C
CALB2	B4GALNT1	CA8	CNIH2	UBE2T
CASP8AP2	B4GALNT4	CA9	CPLX2	ABHD1
CBFA2T2	BARX1	CACNA1A	CRISP3	ACPP
CBLN2	BC009440	CAMP	CRMP1	ACSM3
CCDC88A	BC009862	CASC5	CRYBA2	AI280328
CCDC93	BC014150	CCDC150	DBH	AI801626
CDC25B	BC019026	CCDC151	DDC	AK056098
CDH2	BC019672	CCDC19	DLL3	AR
CDHR1	BC025345	CDC7	DNM1	ARL1
CDKAL1	BC028014	CDCA2	DNMT1	BC034826
CEACAM3	BC035392	CDKN2A	DPF1	C6orf132
CEACAM5	BC038570	CDKN2C	DPYSL5	CCDC78
CEACAM6	BC041890	CELSR3	DSCAML1	CCND1
CEACAM7	BC061893	CEP78	DTL	CHRM1
CECR2	BC067862	CGA	DTX1	CLCN2
CELF3	BC090887	CHRNA3	DUSP26	CLDN8
CELF4	BC127858	CHRNB2	E2F1	CLPX
CENPJ	BCR	CHST8	E2F2	CPNE4
CHGA	BICD2	CIB2	EEF1A2	CROT
CHGB	bK250D10.8	CPT1C	ELAVL3	CUX2
CHRM4	BMP8B	CRABP1	ENO2	CYP1B1
CHST8	BSN	CRIP1	ERN1	CYP39A1
CKM	BTBD12	CSPG4	EZH2	FAM134A
CLASP2	BUB1	CTHRC1	FAM163B	FAM63B
CLSPN	BUB1B	DCLK1	FAM64A	GATA2
CNPY4	BX537706	DENND2A	FAM72B	HOMER2
COL21A1	C10orf132	DLL3	FANCA	HOXB13
COL22A1	C10orf91	DLX4	FIBCD1	Hs.125166
COTL1	C11orf82	DMBX1	FSTL4	Hs.502306
CRABP1	C11orf9	DNAI1	GCK	Hs.656132
CRMP1	C13orf3	DNAI2	GGH	Hs.663487
CRTAC1	C15orf39	DNAJC12	GINS2	Hs.714993
CSMD2	C16orf59	DNAJC6	GPRIN1	Hs.729104
CTHRC1	C16orf75	DNAJC9	GRM4	IDH1
CXCR4	C17orf53	DOK6	H19	KLK2
DAND5	C18orf23	DPYSL2	HCN2	KLK3
DBNDD2	C18orf24	DPYSL3	HEPACAM2	LATS2
DCX	C19orf29	DPYSL5	HEY2	LOC645722
DEFB103B	C19orf43	DSCAML1	HOXC10	NSMCE4A
DESI2	C19orf52	DTX1	HS3ST6	PDCD6IP
DISP2	C19orf57	E2F2	IGF2	PEX11A
DKFZp434C0631	C1orf187	EFNB1	IGFBPL1	PLA2G7
DLGAP1	C2orf48	EFNB3	INA	PMEPA1
DLL3	C2orf70	EID2B	INSRR	POLR3E
DNAJC9	C4orf46	ELF4	IQGAP3	PPAP2A
DONSON	C9orf40	ELMO1	IRX2	PRSS23
DSCAML1	CACNB1	ESPL1	ITPR3	PTGR2
DUSP19	CAMK2N2	FAM123C	JAG2	PTPN21
DUSP26	CASC5	FAM161A	JAKMIP2	RCCD1
DUSP6	CASP2	FAM176A	KCNA4	RDH11
E2F3	CCDC130	FAM184A	KCNB2	REST
E2F6	CCDC150	FAM46A	KCNH3	SAMD4A
EFR3B	CCDC151	FANCA	KCNH6	SH3RF1
EIF1B	CCDC28B	FBXO43	KIF1A	SLC30A4
ELAVL4	CCDC74A	FHAD1	KIFC1	SLC45A3
ENO3	CCDC93	FOXD2	KLK1	SLC52A3
ERC2	CCNA2	FOXN4	KRTAP4-1	SOAT1
FAM132B	CCNB2	FRMD3	LHX2	STEAP1
FAM161A	CCNF	FRMD5	LINGO2	STEAP2
FAM167A	CD24	FYN	LMNB1	SUOX
FAM178B	CDC20	GABBR2	LMX1B	SYTL2
FAM181A	CDC34	GALNT14	LPHN1	TBRG1
FANCL	CDC42BPB	GFI1	LRFN2	TESK2
FBLN7	CDC45L	GGH	2017-03-11	TMPRSS2
FBXW7	CDC6	GJC1	2017-03-04	TRPV6
FCGBP	CDC7	GOLGA7B	MAST1	ZCCHC6
FCRL5	CDCA4	GPC2	MELK	ZNF350
FGF18	CDCA5	GPR153	MKI67	ZNF577
FGF9	CDCA8	GPRIN1	MS4A8B
FMN2	CDK5R2	GRIN2D	MUC13
FMNL3	CDT1	GRM8	MYBL2
FOXA2	CELSR2	GRP	MYT1
FXYD6	CENPA	HCN4	NDST4
FYN	CENPE	HES6	NEURL
FZD8	CENPF	HMGN3	NGB
GABRB3	CENPI	HOXB4	NKX2-1
GAD1	CENPK	HOXD3	NKX2-2
GCNT3	CENPM	HPSE	NOL4
GFI1	CEP55	IFI27L2	NOVA1
GPRIN1	CEP72	IGFBPL1	NPC1L1
GRIK5	CEP78	INA	NPTX1
GRIN2C	CFL1	JAKMIP2	NR0B2
GRM8	CFL1	KCNH6	NRCAM
GRP	CHAC2	KCNH7	NUF2
GUSB	CHAF1A	KCNMB2	NUP210
H3F3A	CHAF1B	KIAA0319	NUSAP1
HCN3	CHML	KIAA0408	OGDHL
HEPACAM2	CHRM4	KIAA2022	OLFM3
HES6	CHRNB2	KIF19	ONECUT2
HEY1	CHST8	KIT	OR51E1
HGC6.1.1	CIT	KLHL32	PCBP3
HMP19	CKAP2L	KPNA2	PCSK2
HOXB-AS3	CLDN9	LAMB1	PEG10
HOXB2	CLSPN	LEFTY1	PGAM2
HOXB3	CNIH2	LMO3	PGBD5
HOXB4	CNPY4	LPL	PLK1
HOXB5	CPLX2	LRRC8C	PPP2R2B
HOXB6	CPNE9	LRTM2	PROX1
HOXB8	CR599439	LZTS1	PTTG1
HOXD10	CR603272	MAP1A	RAB26
HOXD11	CR612213	MAPRE2	RGS7
HOXD13	CREBBP	MAST1	RIBC2
HOXD3	CRTC1	MAT1A	RIMBP2
HOXD8	CRYBA2	MCAM	RNASEH2A
HOXD9	CS444397	MEST	RP11-216L13.5
ID2	CSNK1G2	MST1R	RRM2
ID4	CTPS	MUC1	RTBDN
IGFBPL1	CTXN1	MYBL1	RUNDC3A
IL19	DAND5	MYBL2	S100A5
INA	DAZAP1	MYCN	SCG2
INSM1	DCLRE1B	MYO7A	SCGN
JAKMIP1	DDX11	MYT1	SCIN
JAKMIP2	DEPDC1	NCAM1	SCNN1B
JAM3	DEPDC1B	NDUFA4L2	SEC11L3
KATNAL1	DISP2	NEFL	SERPINA6
KBTBD12	DKFZp434E092	NFASC	SEZ6
KCNB2	DKFZp434F222	NKD2	SIX2
KCNC1	DKFZp434H202	NMU	SLC18A1
KCNC3	DKFZp547H154	NOTCH4	SLC4A11
KCNH3	DKFZp761F2014	NPTX1	SLC6A17
KCNH7	DKFZp761K0816	NPTX2	SNAP25
KCNH8	DLGAP5	NRCAM	SNCB
KCNK10	DNAJB13	NRM	SPIN4
KCNK17	DOT1L	OLFM1	SPRR1A
KIAA1211	DPF1	OLIG1	ST18
KIF19	DPP9	OSBPL6	STMN1
KIF26A	DPYSL5	PAX2	STX1A
KIF5A	DQ575742	PCBP3	SYN1
KIRREL3	DQ582856	PCDHA2	SYNGR4
KIT	DQ588163	PCDHB9	SYP
KITLG	DQ599399	PDZD4	SYT13
KLHL14	DQ601936	PGBD5	SYT4
KLHL41	DSCC1	PGF	TCF19
KLK12	DSCR6	PLAUR	TFF3
KNTC1	DSCR6	PLCD4	TMEM145
LEMD1	DUSP4	PLCL2	TMEM179
LGR5	DUSP8	PLEKHG4	TMEM63C
LINC00958	E2F1	PLEKHH2	TMPRSS6
LINC01116	E2F2	CACNA2D3	TNNT1
LMO2	E2F3	PLS1	TOP2A
LMO3	E2F8	PLXNA2	TPX2
LOC100507377	EEF1A2	PLXNC1	TRIM58
LOC728392	EIF4EBP1	PNMA2	TRIM9
LOXL2	ENO2	PNMAL1	TUBB2B
LPGAT1	EPR-1	PPM1D	TYMS
LPIN1	ESM1	CAMK1D	UBE2T
LRP4	ESPL1	PROCA1	UGT8
LRTM2	ETNK2	PROX1	UHRF1
LYPD1	EXO1	PSD2	UNC13A
LZTS3	F12	PSIP1	UNC13B
MAGED4B	FADS1	RAB33A	UNC5A
MAL	FAM102A	RAB3C	VGF
MANEAL	FAM123C	RBBP8	VTN
2017-03-11	FAM148C	REEP2	VWA5B2
MARK1	FAM161A	RHEBL1	VWDE
MBIP	FAM171A2	RIBC2	WDR62
MBNL3	FAM40B	RNFT2	Z99774.1
MCAM	FAM57B	RPS6KL1	ZIC2
MCOLN3	FAM72B	SCG3	ZNF367
MEX3B	FANCC	SCGB2A1	ENSG00000211618
MGAT5B	FBXL16	SCN8A	ABCC4
MIAT	FBXO43	SEMA5B	AC020593.1
MIER1	FEN1	SGCE	AC078864.20
MIR4697HG	FGD1	SH3GL2	ACPP
MMS22L	FGF11	SIX2	ACTG2
MRAP2	FKBP15	SLC8A2	ADCY5
MTMR9LP	FLJ25404	SLFN13	AL645922.11
MYBPH	FLJ37078	SNAP25	ALDH1A2
MYCL	FOXD1	SOX11	ALDH1A3
NAB1	FOXM1	SPC24	ANGPT1
NAV2	FRMD8	SPEF1	ANTXR2
NHS	FUT7	SRGAP1	ANXA3
NKAIN2	GABRD	STOX1	ASB2
NKX2-1	GALK1	STX2	ATP1A2
NOL4	GAS2L3	SULT4A1	BAG2
NPPA	GCHFR	SYN1	BEX4
NPTX1	GDAP1	SYN2	C15orf48
NR0B2	GFOD1	SYNPO2L	C20orf102
NRCAM	GINS1	SYT1	C2orf40
NRXN1	GLT25D1	TACC3	C3orf14
NUAK1	GMIP	TEKT2	C4orf31
NUAK2	GNAZ	TLE2	C7orf58
NUP160	GNG4	TLE6	CAB39L
NUP62	GPI	TMEM132E	CCDC69
OGDHL	GPRIN1	TMOD2	CCL2
OSBPL3	GPSN2	TMPRSS6	CDH3
PAM	GRM8	TNFRSF25	CES1
PCDH8	GRPEL2	TNIK	CFB
PCLO	GSG2	TNNI3	CHPT1
PCSK1	GTSE1	TNNT1	CHRDL1
PCSK2	HABP2	TOX	CLDN8
PDLIM1	hCG_1997999	TRIM9	CLIP4
PEG10	HCN2	TUBB2B	CNN1
PEX5L	HCN3	UHRF1	CNTN1
PGAP1	HIST1H4A	UNC13A	CPNE4
PGM2L1	HIST3H3	USP11	CPXM2
PHF19	HJURP	WDR62	CREB3L1
PHIP	HMMR	WSCD1	CXCL17
PHYHIPL	HNRNPM	XKR7	CYP1B1
PIP5K1B	HOXC11	ZMYND10	CYP27A1
PITPNC1	HOXC9	ZNF367	CYP39A1
PLAC8	HS3ST6	ZWINT	F3
PLCD4	IER5L	FGF11	FABP3
PLEKHG4B	ILF3	FMN2	FAM129A
PLEKHO1	ILVBL	KIF5A	FAM3D
PLXNA2	INCENP	MIAT	FGF7
PMAIP1	INSM2	PAM	FLNC
PNMA3	IPMK	REEP1	FOXF1
POGK	IQGAP3	SEMA5A	GABRP
POLD3	ITPR3	SLC26A10	GBP2
POMC	JAG2	TAGLN3	GJA1
PRKD3	JAG2	ABAT	GRINL1A
PROM1	K03200	ABCB4	HMGCS2
PROX1	KCNH2	ABCC4	HOXA11
PRTFDC1	KCNK3	ACADL	HOXA13
PSIP1	KIAA0393	ACSM1	HSPB6
PSMC3IP	KIAA0973	ACSM3	HSPB8
PTH2	KIAA1647	ACSS3	IGHA1
PTK2	KIAA1653	ADAM9	IGHG4
PTPRH	KIAA1853	ADHFE1	IGJ
PVALB	KIAA1958	ADRB1	IL33
RAB3C	KIAA1978	AGR2	INMT
RABGAP1L	KIF11	AGTR1	IQGAP2
RALYL	KIF14	ALDH2	JPH2
RBP2	KIF18A	ALOX15B	KCNMB1
RET	KIF18B	ANGPT1	KLK2
REV3L	KIF20A	ANXA1	KLK3
RGS17	KIF21B	ARHGAP6	KRT17
RGS7	KIF23	BAG3	KRT23
RIMKLA	KIF2A	BCAS1	LMOD1
RIMS2	KIF4A	BLNK	LRRC26
RNF182	KIF4B	C10orf81	LTF
RNF183	KISS1R	C4orf32	LXN
RUNDC3A	KLF13	C6orf105	MAOB
S100A2	KLHL26	C8orf4	MKX
S100PBP	KNTC1	CAMKK2	MMP7
SAMD12	KRTAP12-4	CCDC64B	MOXD1
SCD5	KRTAP5-10	CCL3	MPPED2
SCG2	KRTAP5-2	CCND1	MPZL2
SCG3	L2DTL	CD302	MRGPRF
SCG5	LHFPL5	CD9	MSMB
SCGB2A1	LHX2	CDK6	MT1G
SCHIP1	LIN9	CDO1	MYLK
SCN3A	LINGO1	CEACAM1	NEFH
SCN8A	LINGO3	CGREF1	NEXN
SCN9A	LMNB1	CLCF1	OGN
SEC11C	LMNB2	COBLL1	OLFM4
SEMA4C	LOC198437	COL12A1	OR51E2
SEMA6C	LOC389458	COMT	OSR2
SERGEF	LOC401399	CORO1B	PAGE4
SEZ6	LOC440356	CPEB2	PCP4
SEZ6L	LOC90379	CRISP2	PDE5A
SFTA3	LOC90835	CRISPLD1	PDGFC
SHISA2	LPHN1	CRYL1	PDZRN4
SLC26A9	LPL	CRYM	PGM5
SLC35G2	LRRC16B	CYP4F11	PIGR
SLC36A4	LRTM2	CYP4F12	PLN
SLC4A11	LSM7	CYP4F2	PPP1R1B
SLC6A20	LZTS1	DNASE2B	PTGDS
SLC6A5	MAD2L2	DPP4	PTGER2
SLCO3A1	MANEAL	DSC3	PTGS2
SLIT2	MAP1B	EDA	PTN
SLITRK6	MAPK13	ELL2	RANBP3L
SMAD9	MAPK8IP1	ELOVL7	RARRES1
SMPD3	2017-03-04	ENDOD1	RARRES2
SNAP25	MBD3	ERBB3	RASL11A
SNCAIP	MCM10	FAM153A	RSPO3
SOGA3	MCM2	FAM5C	SDR
SOX2	MCM5	FAS	SELM
SPAG11B	MCM6	FBP1	SEMA3C
SPTB	MCM7	FECH	SERPINA3
SRRM3	MFI2	FMO5	SFRP1
ST18	MKI67	FOLH1	SLC2A12
ST6GAL2	MORN3	GAL	SLC35F2
STARD9	MPFL	GALM	SMO
STRA6	MYBL2	GHR	SOX9
STX1A	MYH14	GJB1	SPOCK3
SV2B	MYT1	GLB1L2	STEAP1
SYT13	N4BP3	GLYATL1	STEAP4
TAF6	NAV1	GNG12	SYNM
TAGLN3	NCAPD2	GNG7	SYNPO2
TCERG1L	NDUFA4L2	GOLM1	TCF21
TCP11L1	NEIL3	GPR160	TGM2
TEAD1	NEK2	GREB1	TMEM35
TET1	NETO2	GREM2	TRDV2
TEX101	NEURL	GRTP1	TRIM29
TGIF1	NGF	GUCY1A3	TRPM4
TMEFF1	NKIRAS2	HLA-DMB	TRPV6
TMEM108	NKX2-2	HLA-DRB5	TSLP
TMEM145	NONO	HOOK3	TSPAN8
TMEM150C	NPPB	IKZF2	WFDC1
TMEM163	NPR1	IL1R1	WFDC2
TMEM176A	NR_002834	IL1RAPL1
TMEM179	NR_003716	IMMP2L
TMEM181	NRIP3	ITM2B
TMEM184B	NTN2L	KL
TMEM35	NUDT1	KLHL13
TMEM86B	NUP214	KLK15
TOX	NUSAP1	LACTB
TP53BP2	NY-SAR-48	LATS2
TRAF6	OGDHL	LDHD
TRIM9	OIP5	LGR4
TSPAN11	ONECUT2	LPHN2
TUBA1A	OPRD1	LRRC26
TUBA1C	ORC1L	LTF
TUBA4A	ORC6L	LUZP2
TUBB2B	P2RX6	LXN
UCP3	PAFAH1B3	MALT1
UGT8	PALB2	MESP1
UNC79	PANK1	MID2
USP49	PANK4	MPP7
VEZF1	PAQR4	MUM1L1
VSTM2B	PATL1	NANS
WDSUB1	PCDH24	NAP1L2
WFDC2	PCGF2	NFIL3
WHSC1	PGBD5	NOSTRIN
WNT11	PGSF1	NTN4
XPR1	PHKG1	NTNG1
ZC3H11A	PHYHD1	NUDT4
ZDHHC13	PIP5K1C	OPRK1
ZDHHC22	PKMYT1	PACSIN3
ZMAT4	PLEKHG4B	PARP6
ZNF620	PLK1	PCCA
ACADSB	PLK4	PDIA5
ACSS2	PLXDC1	PEBP4
ADRB2	PNPLA6	PKNOX2
AK4	POLA2	PKP1
AKAP7	POLD1	PLA2G4F
AR	POLRMT	POLB
ARID5B	POMT2	POLD4
C1orf116	PPFIA4	PPFIBP1
C4orf32	PPIA	PPM1H
CALD1	PPP1R9B	PSCA
CGREF1	PRIM1	PTGS2
CIB1	PRPF4	PVT1
COMT	PRPF6	RAB27A
CRYL1	PRPH	RBPMS2
CYB561	PRR11	REPS2
CYR61	PRR19	RFPL1
DCXR	PRR6	RFPL2
DGCR6	PSD	RFX6
DHRS3	PSPN	RGS10
EIF2AK4	PTCHD2	RHOU
ELL2	PTK6	RIPK2
EML1	PTTG1	RNF41
ERGIC1	PTTG2	RORC
ETFDH	PTTG3	RRAS
FABP5	QSOX2	RRAS2
FAH	RAB39	SAMD13
FAHD2A	RAB3C	SC5DL
FAM214A	RAD51AP1	SEC14L2
FAM35A	REEP1	SEL1L
FAM35BP	RFC5	SERP1
FGFRL1	RGS19	SERP2
FOXA1	RNASEH2A	SETD7
GCAT	RNF126	SI
GLUD2	RNF165	SIDT1
GRTP1	RNF168	SIM2
GSTT1	RNPS1	SLC16A9
HIBADH	RPLP0	SLC22A5
HOMER2	RPS6KL1	SLC26A3
ICAM3	RRM2	SLC26A4
IMMP2L	RTBDN	SLC39A6
ITGB5	RTDR1	SLC39A8
IVD	RUNDC3A	SLC43A1
KLK3	S1PR5	SLCO2A1
LATS2	SAFB	SNHG8
MAP2K3	SALL2	SNORA74A
MMAA	SAMD1	SPATA13
MRPL24	SCAMP5	ST6GALNAC1
MRPL40	SEMA6B	STAT6
MRPL41	SENP1	STON1
N4BP2L2	2017-09-03	STON1-GTF2A1L
NEDD4L	SF3A2	STX19
NKX3-1	SF3B2	STXBP6
NME4	SH3GL1	SULT2B1
NMRAL1	SHCBP1	TACC2
NUDT16L1	SIX2	TACSTD2
NUDT2	SKP2	TANC1
PACSIN3	SLC12A5	TGM3
PAG1	SLC25A19	THRB
PHKB	SLC25A5	TMCC3
PIEZO1	SLC26A10	TMEFF2
PIGV	SLC27A3	TMEM117
PLA2G7	SLC2A6	TMEM133
PLD6	SLC38A1	TMEM144
PMM2	SLCO4A1	TMEM87A
PNPLA4	SLPI	TNFAIP3
POLR3H	SMARCA4	TPD52L1
PPAP2A	SMC6	TRPS1
PPM1K	SNCB	TSPAN33
RAB11FIP5	SNX30	TXK
RAB24	SPACA4	WWP1
RB1	SPC24	ZC3H12A
REST	SPC25	ZCCHC6
RGS10	SSBP4	ZNF532
RIPK2	SSRP1
RNF135	STC2
SFT2D1	STMN3
SLC25A1	STX1A
SPDEF	STXBP1
STEAP1	STXBP5L
STEAP1B	SUV39H1
STEAP2	SVOP
SYNGR2	SYN1
SYPL1	SYP
TMEM144	SYT4
TMPRSS2	SYT5
TP53TG1	TACC3
TPD52L1	TBC1D10B
YAP1	TBC1D10B
YBX3	TFAP4
ZBTB16	TFR2
ZG16B	TIGD3
	TIMELESS
	TK1
	TLX1
	TMEM121
	TMEM145
	TMEM151A
	TMEM169
	TMEM16H
	TMEM211
	TMEM59L
	TMEM63C
	TNFRSF13C
	TOP2A
	TOX3
	TPPP3
	TPR
	TPX2
	TRIP13
	TSEN54
	TTLL10
	TULP4
	U52827
	UBE2I
	UBE2S
	UBE2T
	UHRF1
	ULBP1
	UNC13A
	UNC5A
	USH1C
	USP49
	VGF
	VSIG8
	WDHD1
	WDR18
	WDR34
	WDR62
	WDR76
	XKR7
	XRCC2
	ZDHHC13
	ZFHX2
	ZIC2
	ZMYM3
	ZNF367
	ZNF409
	ZNF512B
	ZNF669
	ZWINT
	A26C2
	A26C2
	AASS
	ABRA
	ACOX1
	ACOX3
	ACSM1
	ADAD2
	ADAMTS19
	ADAMTS3
	ADH1A
	ADH1C
	ADH5
	ADPGK
	AF007147
	AF088054
	AF103907
	AGXT2L1
	AJ606331
	AK000872
	AK021804
	AK024242
	AK055166
	AK055854
	AK056686
	AK056703
	AK056897
	AK092451
	AK092578
	AK093002
	AK093265
	AK093513
	AK093987
	AK094166
	AK097613
	AK097722
	AK098403
	AK098656
	AK122786
	AK123272
	AK123582
	AK124066
	AK125310
	AK125532
	AK125871
	AK126213
	AK127270
	AK128569
	AK130400
	AK289390
	AK311558
	AL109700
	AL117630
	AL832786
	ALDH1A2
	ALOX15B
	AMPD1
	AMTN
	ANPEP
	ANXA10
	ANXA3
	AOX1
	AP1S3
	ARFGAP3
	ASAH1
	ASAH3
	ATP1A2
	AUH
	AV1S4A1N1T
	AV2S1A1
	AV8S2
	AX746648
	AX746679
	AX746755
	AX747062
	AX747140
	AX747213
	AX747524
	AX747935
	AY007155
	AY035383
	AY338952
	AY338954
	AY338954
	AY458019
	AY458019
	AY458019
	AZGP1
	BANK1
	BBS4
	BBS5
	BC005905
	BC009626
	BC015671
	BC017398
	BC017721
	BC020168
	BC022382
	BC022493
	BC027846
	BC028123
	BC033400
	BC036209
	BC036311
	BC036594
	BC036850
	BC038532
	BC038725
	BC038731
	BC040632
	BC040718
	BC041470
	BC041634
	BC043424
	BC047600
	BC050344
	BC069815
	BC126901
	BC128380
	BCL2L14
	BMP4
	BRI3
	BX537874
	BX538252
	BX647075
	BX647715
	BX647987
	BX648496
	C10orf47
	C10orf58
	C10orf59
	C11orf48
	C12orf69
	C13orf26
	C14orf126
	C14orf149
	C14orf166B
	C15orf21
	C15orf48
	C17orf90
	C19orf36
	C1orf150
	C1orf186
	C1orf56
	C1orf64
	C1QTNF7
	C1QTNF9
	C20orf166
	C22orf27
	C22orf32
	C2orf43
	C5orf23
	C6orf190
	C9orf19
	C9orf21
	C9orf66
	C9orf82
	CASQ1
	CCDC54
	CCL16
	CD38
	CD3G
	CDC14B
	CDC37L1
	CDC42EP5
	CENPN
	CHCHD1
	CHSY1
	CLCA4
	CLEC9A
	CNDP2
	COBLL1
	COX7A2L
	CPA3
	CPEB2
	CPEB3
	CR590505
	CR591360
	CR592260
	CR609342
	CR614284
	CR614561
	CR749823
	CREB3L4
	CTGLF4
	CXCL11
	CYP2J2
	CYR61
	D28589
	DBI
	DEFB132
	DHRS7
	DIS3
	DKFZp434G0827
	DKFZp434K191
	DKFZp451E015
	DKFZp451J181
	DKFZp761L1918
	DPT
	DPYS
	DQ372722
	DQ581043
	DQ582484
	DQ582484
	DQ583164
	DQ583610
	DQ584674
	DQ589377
	DQ591735
	DQ592463
	DQ595048
	DQ595048
	DQ595091
	DQ596676
	DQ596733
	DQ601664
	DQ786271
	DSC3
	DUSP14
	DUSP3
	EGR3
	EHHADH
	EIF5AL1
	ELK4
	ELL3
	ENTPD5
	EPHA5
	ERP29
	F10
	FAM170A
	FAM174B
	FAM177A1
	FAM45B
	FAM82A1
	FAM83B
	FBL3B
	FBP1
	FGF2
	FLJ16686
	FLJ44635
	FLJ46838
	FNDC4
	FXC1
	GALM
	GDE1
	GDEP
	GGTA1
	GIPC2
	GLB1L2
	GLUD1
	GNMT
	GPR155
	GREB1
	GRIA2
	GRRP1
	GSTA3
	GYS1
	HECW1
	HEPN1
	HILS1
	HIST1H2BC
	HIST4H4
	HMG20B
	HSD17B6
	IL33
	IMMP2L
	INTS10
	IQWD1
	ITGAD
	ITPKC
	KCNIP1
	KCNJ10
	KCNU1
	KGFLP1
	KIAA0984
	KIAA1210
	KIAA1890
	KIF1C
	KLF8
	KLRC1
	KRT2
	KRTAP13-2
	L3MBTL3
	LACTB
	LASS3
	LENG9
	LEPREL1
	LIX1
	LMOD3
	LOC100134860
	LOC123688
	LOC147804
	LOC257358
	LOC441294
	LPA
	LRCH2
	LRRC18
	LRRN4CL
	LRRTM4
	M84131
	MAN2B2
	MAP1D
	MESP1
	MIPEP
	MON1B
	MPDU1
	MPDU1
	MS4A10
	MS4A2
	MSMB
	MXRA7
	MYO16
	NAALAD2
	NAMPT
	NAT2
	NDEL1
	NDN
	NDP
	NDUFB3
	NDUFV2
	NKAIN3
	NLRP13
	NLRP8
	NPCR
	NPR3
	NR_001575
	NR_002769
	NR_003001
	NR_003036
	NR_003366
	NR4A1
	NR4A1
	NRG4
	NRK
	NSMAF
	NT5C2
	NTRK3
	NUDT19
	OAS2
	OAZ3
	OR10H1
	OR2C3
	OR7A5
	ORC5L
	ORMDL1
	OSTbeta
	OTX1
	PAFAH2
	PAGE4
	PAK1IP1
	PCOTH
	PER1
	PFTK2
	PGCP
	PHOSPHO2
	PI15
	PLA2G2C
	PLA2G2F
	PLEKHB2
	PLIN
	PNKD
	POLB
	PPAPDC2
	PRKAG1
	PRKCH
	PRNP
	PROK1
	PRSS21
	PSCD1
	PSTPIP2
	PTGDS
	RAB27A
	RAB9A
	RABEP2
	RAMP1
	RBL2
	RDH11
	RDH12
	RFX6
	RGN
	RGS13
	RLBP1L2
	RLN1
	RLN2
	RNF185
	RPE65
	RPS27L
	RPS6KC1
	RRAS
	RSPO2
	RYR3
	SAR1B
	SCMH1
	SCN2B
	SCRN3
	SELE
	SERHL
	SERHL2
	SFT2D1
	SHROOM1
	SIGLEC8
	SLAIN2
	SLC12A3
	SLC14A1
	SLC16A2
	SLC23A1
	SLC25A16
	SLC26A3
	SLC26A4
	SLC27A6
	SLC2A12
	SLC38A4
	SLC7A13
	SLC9A9
	SLCO1A2
	SNTB2
	SNX17
	SNX9
	SOX14
	SPATA1
	SPATA18
	SPINK8
	SRBD1
	SRD5A2
	SSAT2
	STAB2
	STARD5
	STK17B
	SUOX
	SYT10
	SYT14L
	SYT6
	TARSL2
	TBC1D12
	TCEAL6
	TCEAL7
	TCRBV5S1A1T
	TCRBV8S1
	TCRVA2
	TECTB
	THTPA
	THYN1
	TLK1
	TM2D2
	TMED3
	TMEM159
	TMEM16G
	TMEM220
	TMEM26
	TMEM49
	TMEM98
	TMLHE
	TMPRSS11F
	TNMD
	TPSD1
	TRA
	TSLP
	TSPYL1
	TXNDC4
	TYW1
	VGLL3
	WBSCR21
	WDR63
	WDR93
	WT1
	YIPF1
	YPEL5
	ZC3H12A
	ZCCHC2
	ZDHHC18
	ZNF18
	ZNF436
	ZNF697

## Sheet: SuppTable 2 ADT-RS genes coeffi
Supplemanry Table 2: Coefficients of genes in the final ADT-RS model.
genes	Coeff in untreated group	Coeff in treated group	Function
PRKAG1	-6.33891	0	AMP-activated protein kinase (AMPK), an energy sensor protein kinase that plays a key role in regulating cellular energy metabolism
KIAA1210	-3.9371	0
MORN3	-3.7122	0
TMEM133	-3.45756	1.22193
CCDC151	-3.35072	0.420145	motile cilia
EHHADH	-2.95172	0	Faty acid metabolism
TXK	-2.78639	0	Cell adhesion and immune response
LRRC18	-2.42353	1.5042
NUDT1	-2.21441	0	DNA damage and apoptosis
EZH2	-2.03534	0	methyltransferases critical for cancer development
CCL16	-1.82467	0	chemoattractant activity
CLEC9A	-1.59313	4.84305	Dendritic cells development
SEMA3C	-1.33672	0.492556	Axon guidance
PRTFDC1	-0.756692	0
ALDH2	-0.495465	0	Faty acid metabolism
TACC2	-0.195488	0	AR target,regulate centrosome-mediated interkinetic nuclear migration (INM) of neural progenitors
HEPN1	-0.0835864	0.583004	cell growth and apopotosis
KLK12	-0.0653029	0	AR signaling
C8orf4	-0.0323382	-0.793723	regulator of the Wnt/beta-catenin signaling pathway
NLRP13	-0.0231749	0	Inflammation
CRYM	0	-6.14733	major proteins of vertebrate eye lens and maintains the transparency and refractive index of the lens
FAHD2A	0	-0.376861	Hydrolase activity
GLYATL1	0	-3.46113	Amin acide conjugation
HEY2	0	1.35711	Notch signaling, AR target
HJURP	0	1.59701	DNA damage
KCNH8	0	-4.02515	voltage-gated ion channels for neurotransmitter release
LPGAT1	0	2.8555	Acyltransferase
MSMB	0	-0.109605	member of the immunoglobulin binding factor family
NPR3	0	-1.49893	Receptor for the natriuretic peptide hormones. May regulate blood pressure
PEX11A	0	3.9151	Axon guidance
RBPMS2	0	2.27891	regulation of smooth muscle cell differentiation and proliferation in the gastrointestinal system
SFTA3	0	0.836221	NKX2.1 Associated Non-Coding Intergenic RNA
SLC35F2	0	6.24713	Lung Squamous Cell Cancer Related Protein
TFAP4	0	4.53151	Protein dimerization
SOX14	0.234591	-1.29956	embryonic developmen and cell fate
B3GALTL	0.301311	-7.03208	glycosylation
LSM7	0.382088	0	mRNA splicing
RLN1	0.436944	-2.36752	Works with estrogen at birth
FAM134A	0.503562	3.34169	Metastasis Associated Gene
ID2	0.592488	0	pluripotency of stem cells
CDH26	0.798799	-1.8008	cell-cell adhesion
SELE	0.81019	-6.71642	Cell-surface glycoprotein having a role in immunoadhesion
GALM	1.7822	-3.03597	glucose metabolism
FBXO43	2.51836	-3.12012	ubiquitination and degradation
DNAJC12	2.72079	-0.0730603	protein folding and export,AR target
TM2D2	2.77763	0	Cell death and proliferation
STMN1	4.0396	1.93766	regulation of the microtubule (MT) filament system. May play role in axon formation during neurogenesis
NAV2	4.20843	2.1783	neuronal development and migration,AR target
GABRB3	5.36019	-1.69443	neurotransmission of the mammalian nervous system

## Sheet: SuppTable 3 Matched Cohort
	Supplementary Table 3. Demographic and clinical characteristics of reweighted and matched patient set
	Variables	ADT Treated	Non-ADT Treated	Fisher's/Wilcoxon Test
	No. patients (%)	306 (100%)	306 (100%)	P-value
	Patient age, yr			0.001
	Median (Range)	63 (47, 77)	61 (46, 78)
	IQR (Q1, Q3)	58 - 69	57 - 66
	Preoperative PSA (ng/ml)			0.006
	Median (Range)	10.1 (2.2, 77)	9.05 (1.8, 78)
	IQR (Q1, Q3)	6.2 - 17.8	5.8 - 12.8
	Pathologic Gleason Score, n (%)			0.179
	≤6	15 (5%)	14 (5%)
	7 (3+4)	103 (34%)	110 (36%)
	7 (4+3)	46 (15%)	47 (15%)
	8	30 (10%)	46 (15%)
	≥9	112 (37%)	89 (29%)
	Extraprostatic Extension, n (%)			0.509
		179 (58%)	188 (61%)
	Seminal Vesicle Invasion, n (%)			0.685
		145 (47%)	139 (45%)
	Positive Surgical Margins, n (%)			0.869
		187 (61%)	184 (60%)
	Lymph Node Involvement, n (%)			1
		91 (30%)	92 (30%)
	Adjuvant Radiation Therapy, n (%)			<0.001
		71 (23%)	30 (10%)

## Sheet: SuppTable4 Survival AUCs
Supplementary Table 4. Survival c-indices in discriminating metatastic risk for three genomic signatures
Data Set	Signature	Survival C-index (95% CI)
		5 Years	10 Years
Validation Set I	ADT-RS*	0.63 (0.54, 0.70)	0.68 (0.56, 0.73)
	Decipher	0.80 (0.73, 0.85)	0.70 (0.59, 0.79)
	md-CCP	0.65 (0.59, 0.73)	0.61 (0.54, 0.68)
Validation Set II	ADT-RS*	0.63 (0.58, 0.67)	0.65 (0.59, 0.69)
	Decipher	0.72 (0.67, 0.76)	0.71 (0.65, 0.76)
	md-CCP	0.60 (0.55, 0.66)	0.58 (0.53, 0.64)
Validation Set III	ADT-RS*	0.65 (0.59, 0.71)	0.59 (0.52, 0.66)
	Decipher	0.64 (0.58, 0.70)	0.61 (0.54, 0.67)
	md-CCP	0.57 (0.51, 0.63)	0.51 (0.45, 0.57)
*ADT-RS scores were multiplied by a factor of -1 so that higher scores reflect a higher
risk of metastasis

## Sheet: SuppTable 5 Marginal Int
Supplementary Table 5. Marginal ADT by genomic biomarker interaction effect
Model	Variables	HR	95% LB	95% UB	p-value
ADT-RS	ADT-RS	0.808534	0.663592	0.985136	0.178705
	ADT	0.837699	0.575853	1.21861	0.554026
	ADT-RS:ADT Interaction	0.604029	0.435625	0.837535	0.0354398
Decipher	Decipher	1.62995	1.30048	2.04288	0.0367201
	ADT	0.118926	0.0319092	0.443241	0.0440637
	Decipher:ADT Interaction	1.60639	1.07526	2.39989	0.170629
md-CCP	md-CCP	1.35233	1.11411	1.64147	0.206643
	ADT	0.319707	0.220321	0.463925	<0.001
	md-CCP:ADT Interaction	1.39674	1.02435	1.90449	0.251279
	Hazard ratios for genomic risk models reported per standard deviation increase in score
			`
