# Supplementary figures and images for: Development and Validation of a Prostate Cancer Genomic Signature that Predicts Early ADT Treatment Response Following Radical Prostatectomy
Source: Oxford University Press journal article supplement (doi:10.1158/1078-0432.ccr-17-2745), 2018-05-14

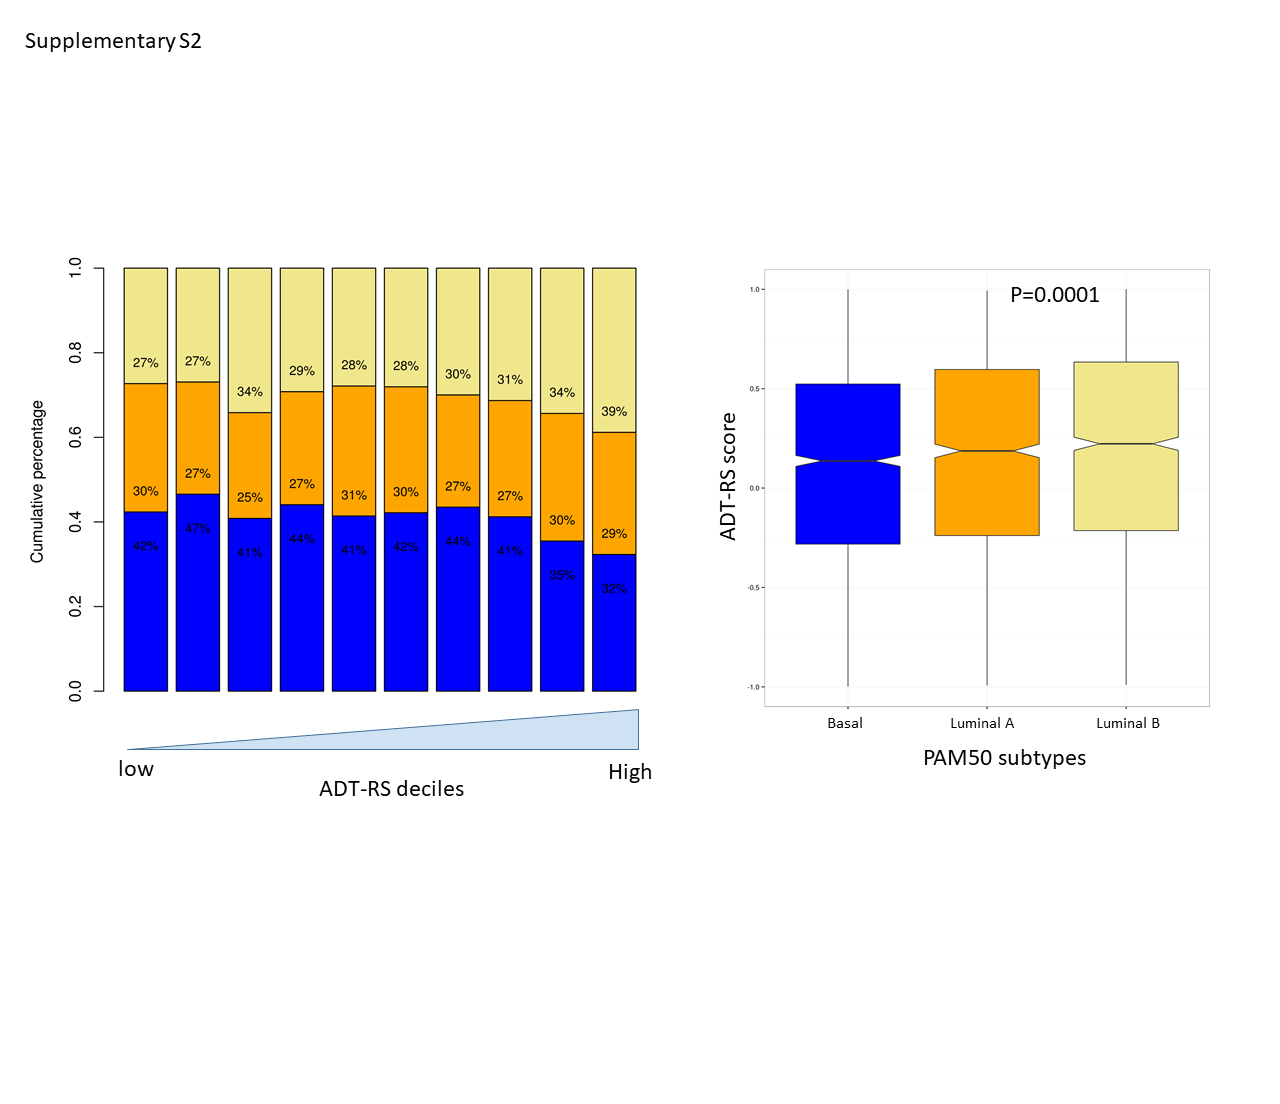
Fig. S2

Supplement: 10780432ccr172745-sup-189590_3_supp_4732618_p85std.docx [file 10780432ccr172745-sup-189590_3_supp_4732618_p85std.docx]
